# Supplementary material
Source: publisher figshare collection journal article supplement (https://tandf.figshare.com/ndownloader/files/14502128)
Supplement: Supplementary file 1 [file 14502128]

## **Supplemental Material**

**Title:** Influence of Stormwater Control Measures on Water Quality at Nested Sites in a Small Suburban Watershed

**Authors:** Rachel D. Scarlett, Sara K. McMillan, Colin D. Bell, Sandra M. Clinton, Anne J. Jefferson, P. Suresh C. Rao

**Number of Pages:** 6

**Number of Figures:** 4

**Number of Tables:** 2

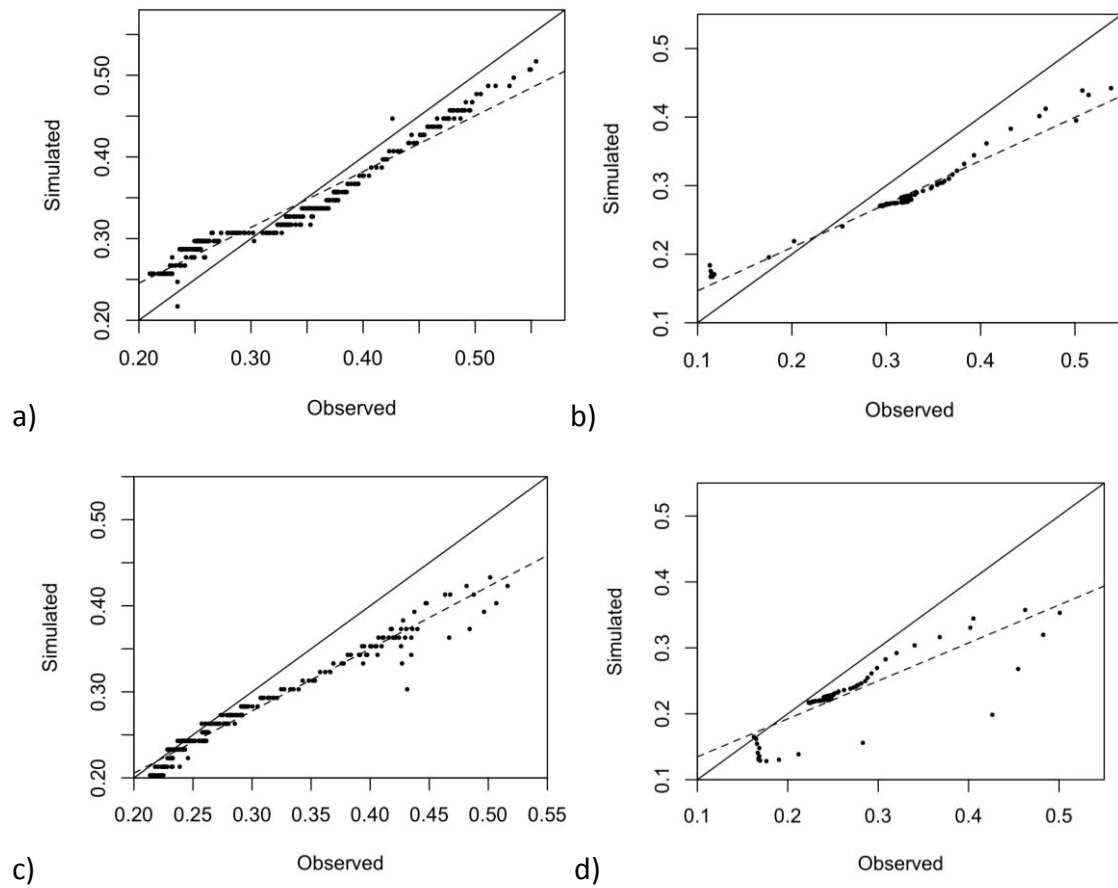

**Figure S1.** Simulated vs. observed stage at a) SP-2 during a storm in April, b) SP-2 during a storm in September, c) SP-3 during a storm in April, and d) SP-3 during a storm in September.

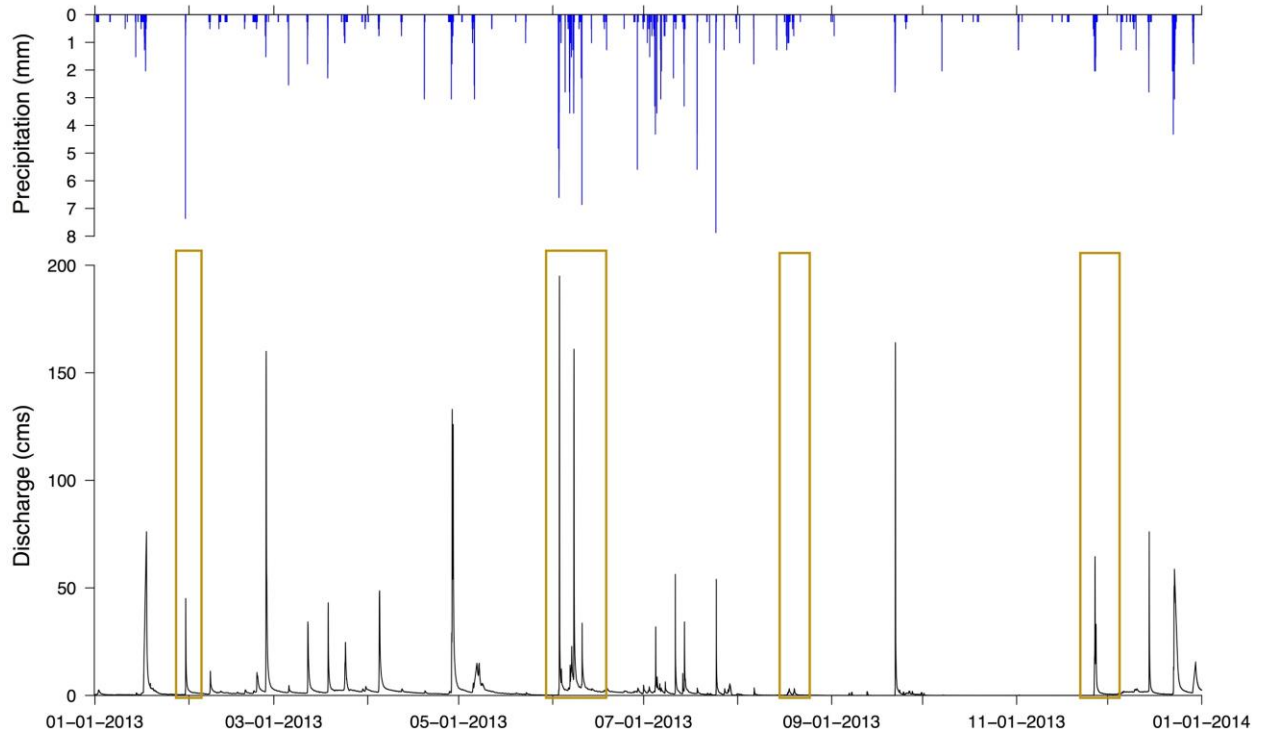

**Figure S2.** Hydrograph at the USGS gauge (#0214297160) on Beaverdam Creek and hyetograph at the CRN-21 rain gauge for 2013. The four seasonal storm periods that we sampled are highlighted in yellow. Within the 4 sampling periods we sampled 8 individual storms.

**Table S1.** Mean percent change in concentration of temporally matched storm samples at SP-US and DS locations– SP-1, SP-2 and SP-3– along the longitudinal gradient. Values indicate mean percent change (%)  $\pm$  standard deviation, and number of samples (n). Positive values indicate an increase in concentration relative to SP-US, and negative values indicate a decrease in concentration.

| Solute          | Site                            |                    |      |                   |      |                    |    |
|-----------------|---------------------------------|--------------------|------|-------------------|------|--------------------|----|
|                 | SP-1                            | n                  | SP-2 | n                 | SP-3 | n                  |    |
|                 | NO <sub>3</sub> <sup>-</sup> -N | 17.58 $\pm$ 37.28  | 65   | 8.23 $\pm$ 29.57  | 44   | 19.71 $\pm$ 56.42  | 51 |
|                 | NH <sub>4</sub> <sup>+</sup> -N | 53.44 $\pm$ 106.16 | 56   | 3.57 $\pm$ 128.68 | 35   | -42.53 $\pm$ 77.69 | 40 |
| <i>Reactive</i> | SRP                             | 38.18 $\pm$ 74.48  | 65   | 52.64 $\pm$ 75.07 | 43   | 24.34 $\pm$ 71.67  | 51 |
| <i>Solutes</i>  | DOC                             | 8.45 $\pm$ 70.45   | 67   | -6.16 $\pm$ 46.63 | 44   | -8.87 $\pm$ 49.16  | 51 |
|                 | DON                             | 23.44 $\pm$ 34.16  | 67   | 11.12 $\pm$ 31.81 | 44   | 8.14 $\pm$ 39.93   | 51 |
|                 | K <sup>+</sup>                  | 8.88 $\pm$ 20.64   | 56   | 12.42 $\pm$ 26.97 | 35   | 8.02 $\pm$ 24.06   | 40 |
| <i>Less</i>     | Mg <sup>2+</sup>                | -1.45 $\pm$ 8.86   | 56   | 3.32 $\pm$ 14.6   | 35   | 27.65 $\pm$ 21.87  | 40 |
| <i>Reactive</i> | SO <sub>4</sub> <sup>2-</sup>   | -5.42 $\pm$ 10.42  | 56   | 7.08 $\pm$ 23.76  | 35   | 85.42 $\pm$ 100.65 | 40 |
| <i>Solutes</i>  | Ca <sup>2+</sup>                | -1.28 $\pm$ 9.97   | 56   | 4.05 $\pm$ 15.55  | 35   | 24.68 $\pm$ 23.54  | 40 |

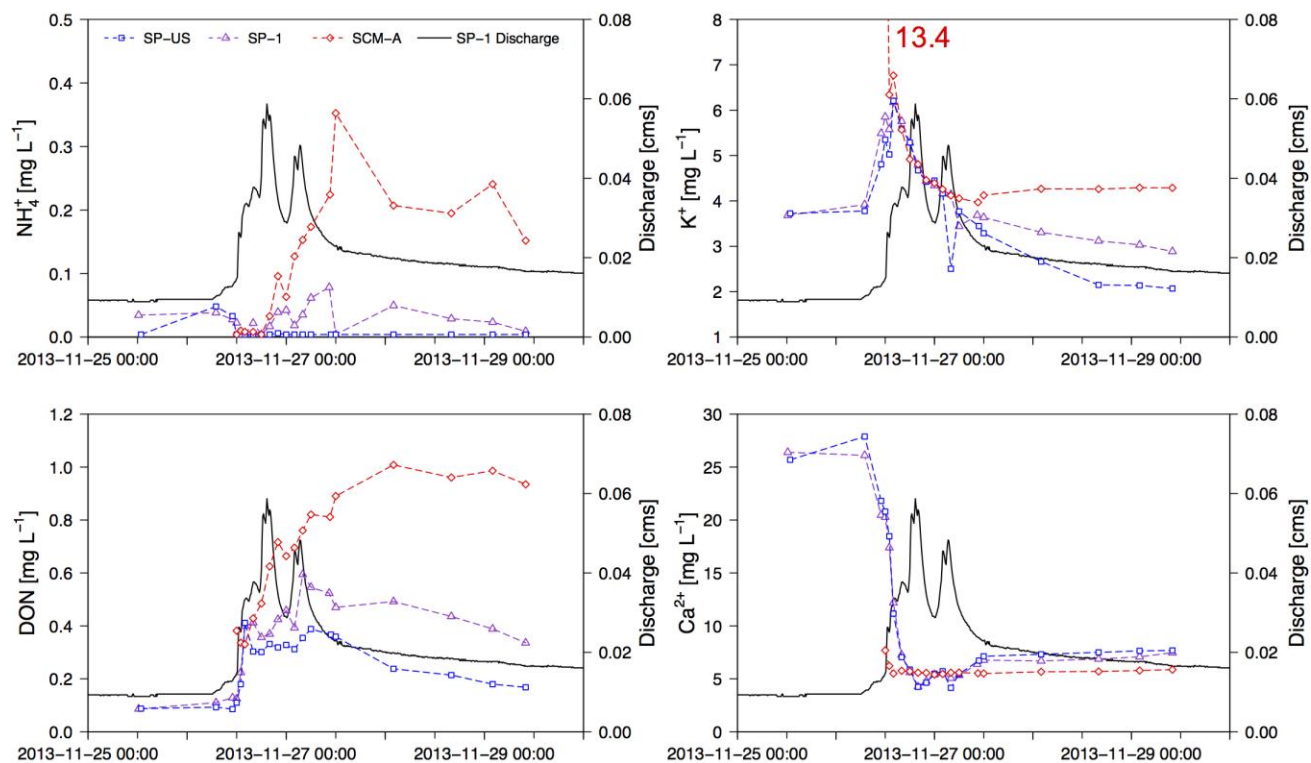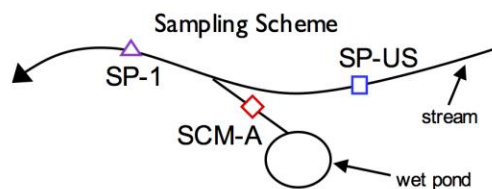

**Figure S3.** Concentrations at SP-US, SP-1, and SCM-A during the November storms. SP-1 represents the confluence of SCM-A outflow and instream flow at SP-US. Concentrations that are higher than the maximum value of the graph space are noted within the figure and color coded by site.

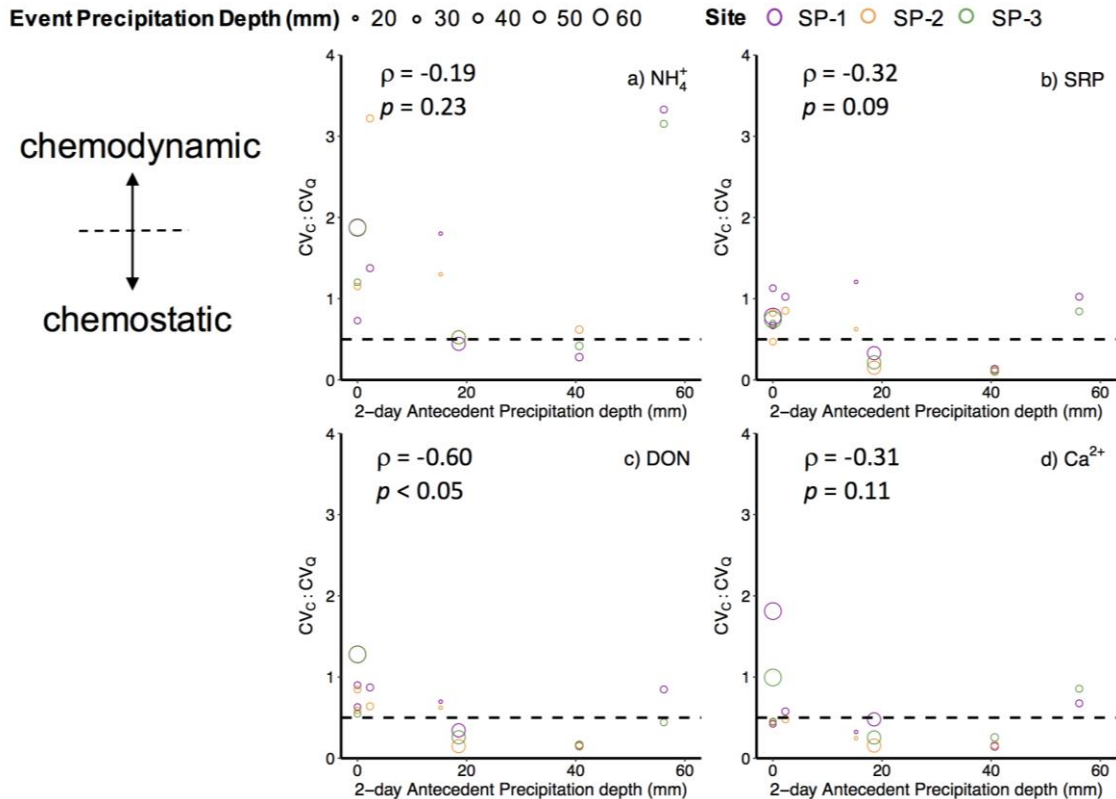

**Figure S4.**  $\text{CV}_c:\text{CV}_Q$  vs. 2-day antecedent precipitation depth, coded by size to indicate event precipitation depth and by color to indicate site. Sites included SP-1, SP-2, and SP-3, and all sites are aggregated to a single plot.  $\text{CV}_c:\text{CV}_Q$  values below 0.5 are considered chemostatic, and values above 0.5 are considered chemodynamic.

**Table S2.** Mean concentration (mg/L)  $\pm$  95% confidence interval on the recession of the second November storm ( $n=9$ ;  $n=8$  for  $\text{SO}_4^{2-}$ ).

| Solute                       | Site               |                   |                   |                   |
|------------------------------|--------------------|-------------------|-------------------|-------------------|
|                              | SP-US              | SCM-A             | SP-1              |                   |
| <i>Reactive Solutes</i>      | $\text{NO}_3^-$ -N | $0.173 \pm 0.035$ | $0.392 \pm 0.05$  | $0.261 \pm 0.025$ |
|                              | $\text{NH}_4^+$ -N | $0.004 \pm 0.00$  | $0.196 \pm 0.051$ | $0.037 \pm 0.016$ |
|                              | SRP                | $0.135 \pm 0.057$ | $0.505 \pm 0.039$ | $0.257 \pm 0.036$ |
|                              | DOC                | $4.798 \pm 0.891$ | $6.849 \pm 0.252$ | $5.402 \pm 0.643$ |
|                              | DON                | $0.289 \pm 0.057$ | $0.871 \pm 0.075$ | $0.472 \pm 0.052$ |
|                              | $\text{K}^+$       | $2.942 \pm 0.548$ | $4.196 \pm 0.089$ | $3.51 \pm 0.323$  |
| <i>Less Reactive Solutes</i> | $\text{Mg}^{2+}$   | $2.299 \pm 0.35$  | $1.844 \pm 0.06$  | $2.19 \pm 0.248$  |
|                              | $\text{SO}_4^{2-}$ | $5.275 \pm 0.618$ | $2.799 \pm 0.078$ | $4.568 \pm 0.287$ |
|                              | $\text{Ca}^{2+}$   | $6.566 \pm 0.814$ | $5.625 \pm 0.095$ | $6.342 \pm 0.562$ |
